# Supplementary material for: (Hydroxypropyl)methyl Cellulose-Chitosan Film as a Matrix for Lipase Immobilization—Part ΙΙ: Structural Studies
Source: MDPI journal article supplement (doi:10.3390/gels8090595), 2022-09-17
Supplement: s1 [file s1]

## Article

# (Hydroxypropyl)methyl Cellulose-Chitosan Film as a Matrix for Lipase Immobilization. Part II: Structural Studies

Evdokia Vassiliadi <sup>1,2</sup>, Marta Tsirigotis-Maniecka <sup>3</sup>, Henry E. Symons <sup>4</sup>, Pierangelo Gobbo <sup>5</sup>, Frédéric Nallet <sup>6</sup>, Aristotelis Xenakis <sup>1</sup> and Maria Zoumpanioti <sup>1,\*</sup>

## Supplementary material

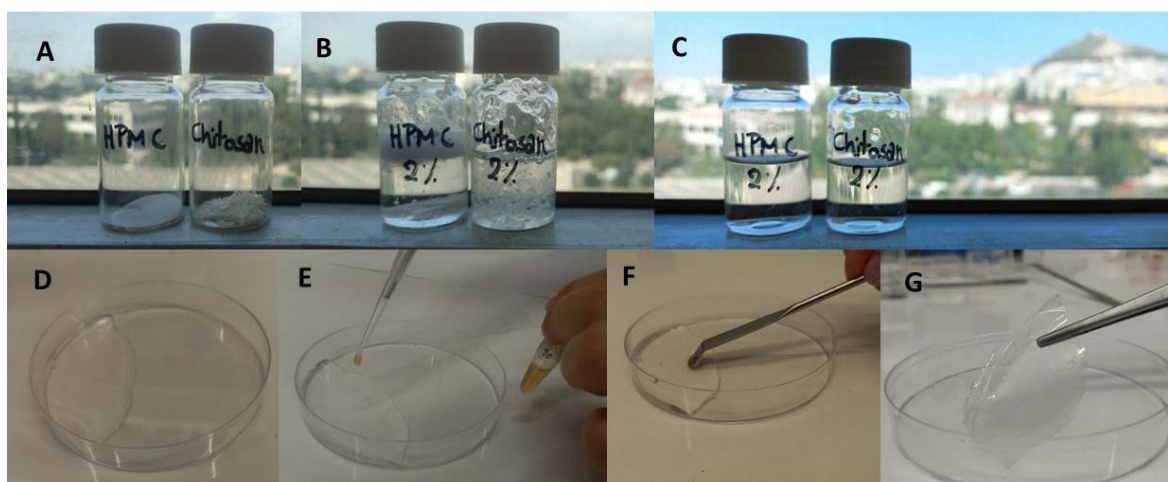

**Figure S1.** Step by step procedure for the production of the enzyme-loaded film. (A) The two polymers, HPMC and Chitosan; (B) Dilution of the two polymers in distilled water and acidic water (1%) for HPMC and Chitosan, respectively. They are then left overnight; (C) solutions of the two polymers, the next day; (D) Mix of the two polymer solutions on a petri dish, HPMC:Chitosan=2:1; (E) Addition of the enzyme-containing buffer; (F) Gentle stirring with spatula to homogenize the liquid; (G) After overnight drying, the film can be pilled off of the petri dish.

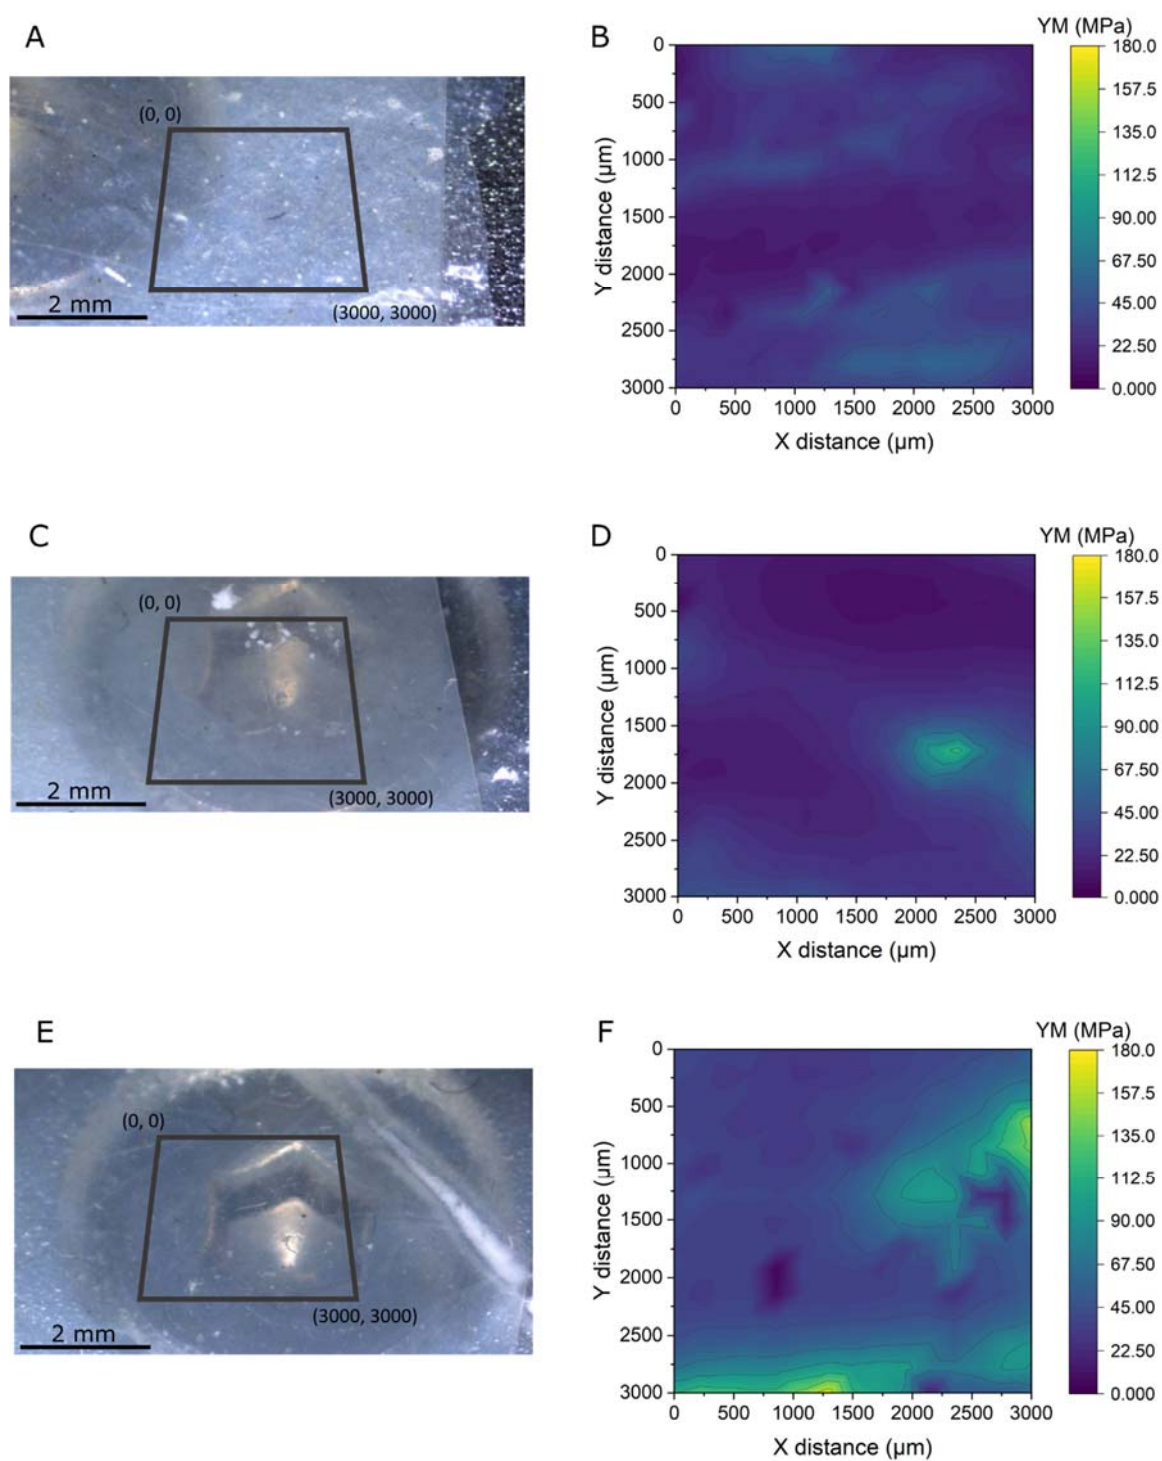

**Figure S2.** Mechanical characterization of HPMC-CS films: Optical micrographs of the films used for mechanical testing before usage (A), after 5 usage cycles (C), and after 10 usage cycles (E), with testing area and coordinates shown. Young's modulus maps from areas depicted in optical micrographs for films before usage (B), after 5 usage cycles (D), and after 10 usage cycles (F). Colormap maintained for comparison between samples.

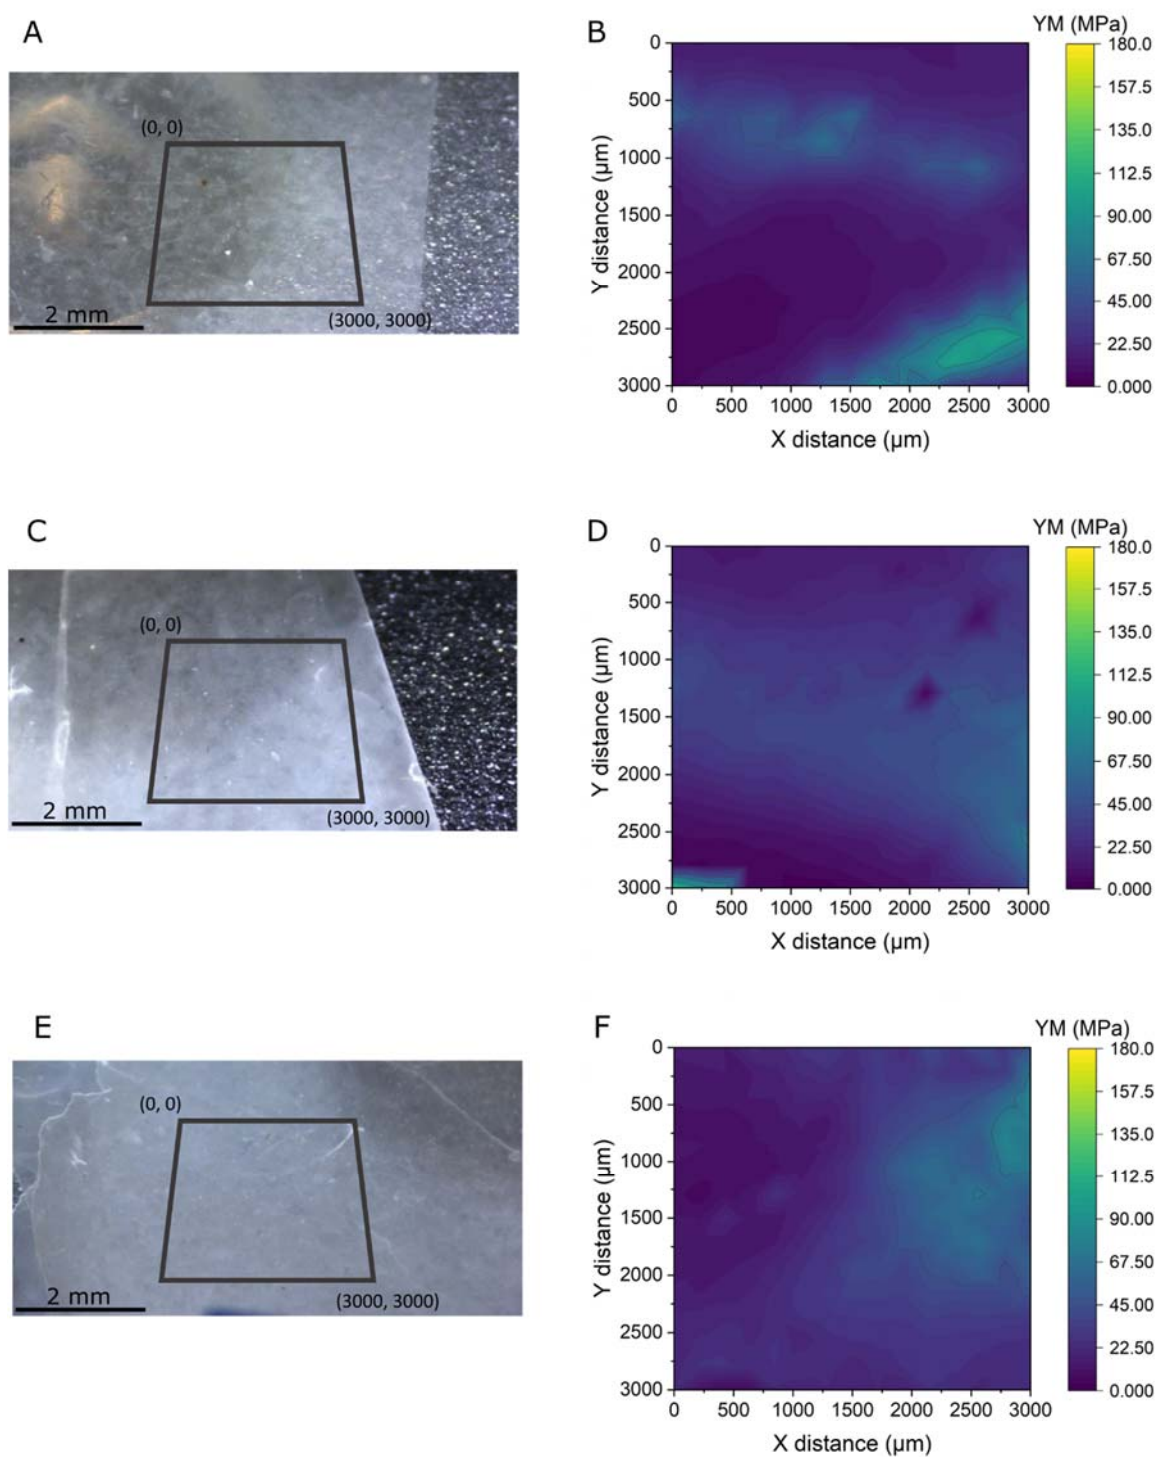

**Figure S3.** Mechanical characterization of enzyme-loaded HPMC-CS films: Optical micrographs of the films used for mechanical testing before usage (**A**), after 5 usage cycles (**C**), and after 10 usage cycles (**E**), with testing area and coordinates shown. Young's modulus maps from areas depicted in optical micrographs for films before usage (**B**), after 5 usage cycles (**D**), and after 10 usage cycles (**F**). Colormap maintained for comparison between samples.
